# Supplementary material for: A non-linear beta-binomial regression model for mapping EORTC QLQ- C30 to the EQ-5D-3L in lung cancer patients: a comparison with existing approaches
Source: Springer Nature journal article supplement (doi:10.1186/s12955-014-0163-7), 2014-11-11
Supplement: MOESM9 [file 9763864]

**Supplementary Figure 2: Normal Probability plots (TOPICAL)**


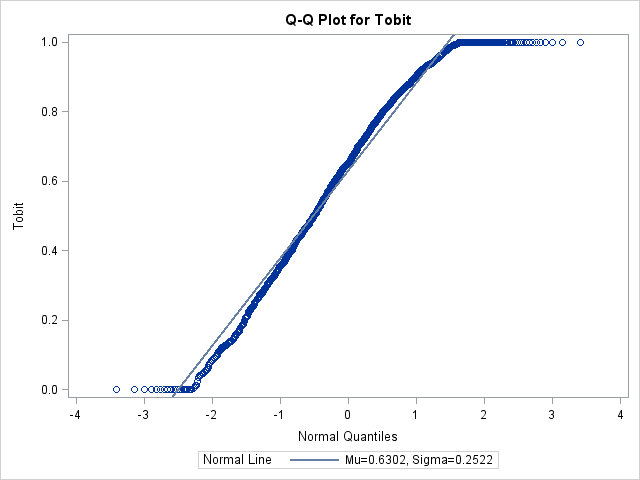


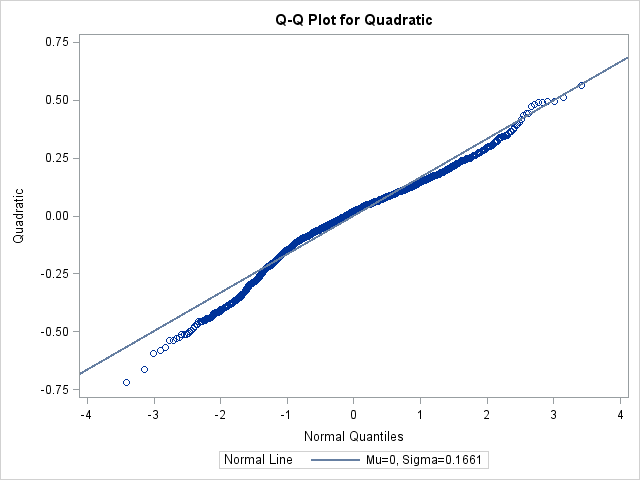

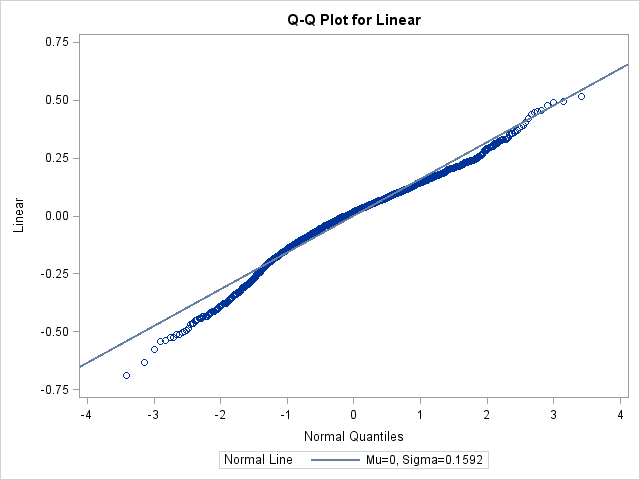


TOBIT

Quadratic

Linear


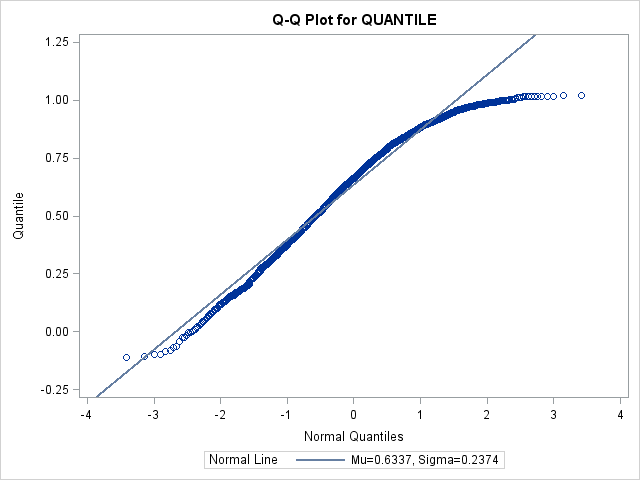


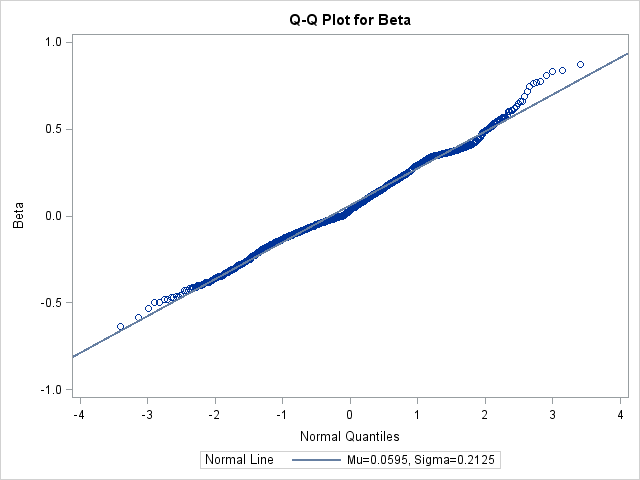

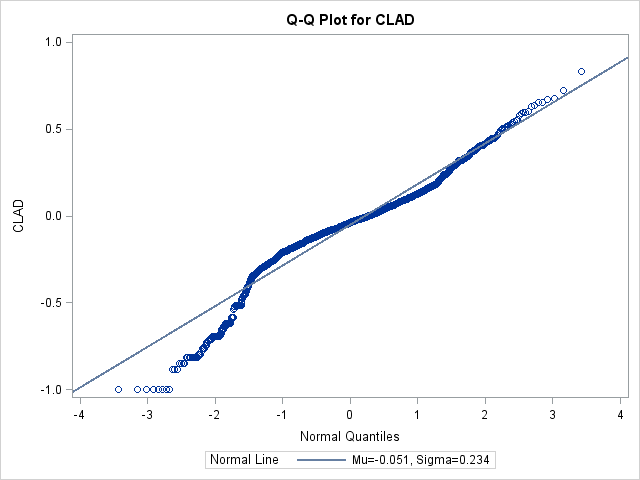


Beta Binomial

Quantile

CLAD
